# Supplementary material for: Near-Infrared Fluorescence Imaging with Indocyanine Green for Robot-Assisted Partial Nephrectomy: A Systematic Review and Meta-Analysis
Source: MDPI journal article supplement (doi:10.3390/cancers15235560), 2023-11-24
Supplement: s1 [file s1]

# **Near-Infrared Fluorescence Imaging with Indocyanine Green for Robot-Assisted Partial Nephrectomy: A Systematic Review and Meta-Analysis**

**Carlo Giulioni <sup>1,\*</sup>, Prashant Motiram Mulawkar <sup>2,3,4</sup>, Daniele Castellani <sup>1</sup>, Virgilio De Stefano <sup>1</sup>, Carlotta Nedbal <sup>1</sup>, Nariman Gadzhiev <sup>5</sup>, Giacomo Maria Pirola <sup>6</sup>, Yu Xi Terence Law <sup>7</sup>, Marcelo Langer Wroclawski <sup>8</sup>, William Ong Lay Keat <sup>9</sup>, Ho Yee Tiong <sup>7</sup>, Bhaskar Kumar Somani <sup>10</sup>, Andrea Benedetto Galosi <sup>1</sup> and Vineet Gauhar <sup>11</sup>**

<sup>1</sup> Urology Unit, Azienda Ospedaliero Universitaria delle Marche, Polytechnic University of Marche, 60121 Ancona, Italy

<sup>2</sup> Department of Urology, Tirthankar Super Speciality Hospital, Akola 444001, India

<sup>3</sup> Government Medical College, Srinagar's Super Speciality Hospital, 3QPX+9GP, Bemina, Srinagar 190010, India

<sup>4</sup> Urology Unit, University of Edinburgh, Edinburgh EH8 9YL, UK

<sup>5</sup> Department of Urology, Saint-Petersburg State University Hospital, Petersburg 190103, Russia

<sup>6</sup> Urology Unit, San Giuseppe Hospital, Multimedica Group, 20123 Milan, Italy

<sup>7</sup> Department of Urology, National University Hospital, National University Health System, Singapore 119228, Singapore

<sup>8</sup> Hospital Israelita Albert Einstein, São Paulo 05652-900, Brazil

<sup>9</sup> Department of Urology, Penang General Hospital, George Town 10990, Malaysia

<sup>10</sup> Department of Urology, University Hospitals Southampton, NHS Trust, Southampton SO16 6YD, UK

<sup>11</sup> Department of Urology, Ng Teng Fong General Hospital, Singapore 609606, Singapore

\* Correspondence: carlo.giulioni9@gmail.com

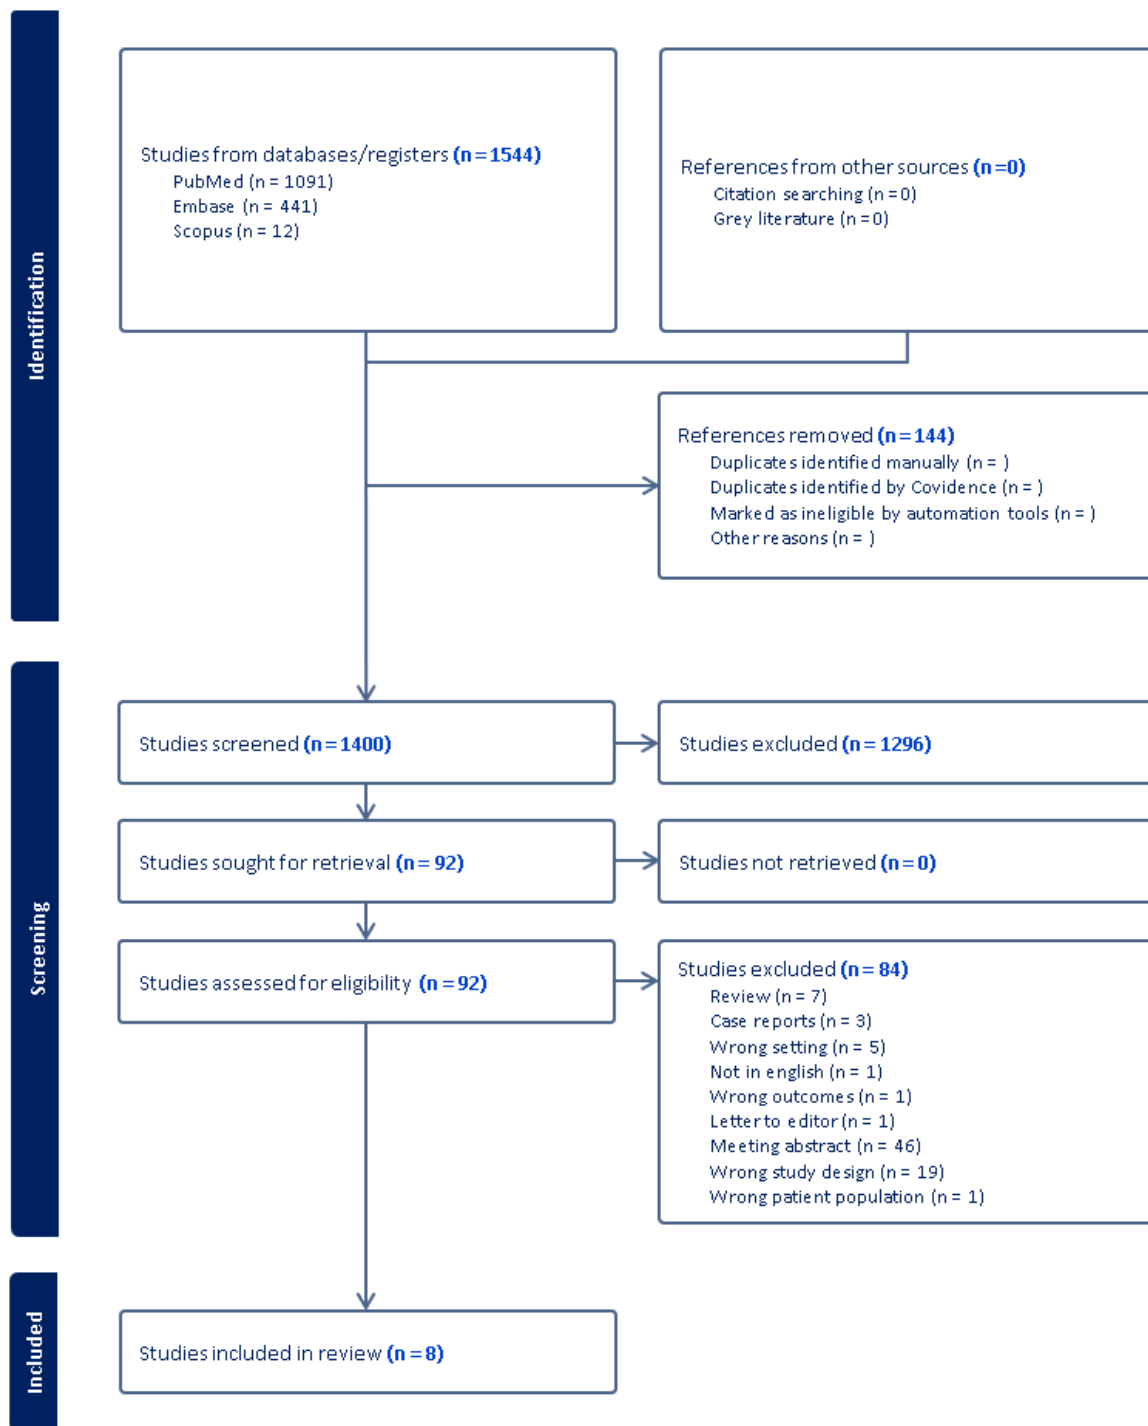

**Figure S1.** PRISMA 2009 flow diagram.

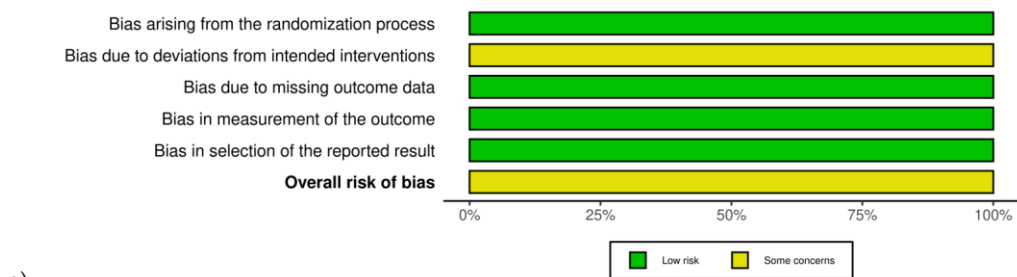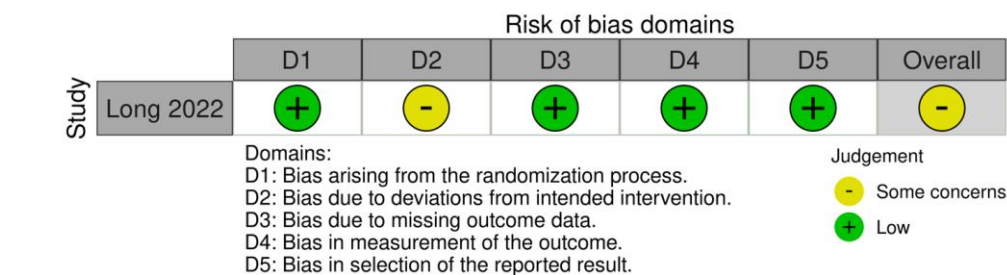

**Figure S2.** Risk of bias of the included study (Rob2): (A) review authors' judgments about each risk of bias item presented as percentages across all included studies; (B) review authors' judgments about each risk of bias item for each included study.

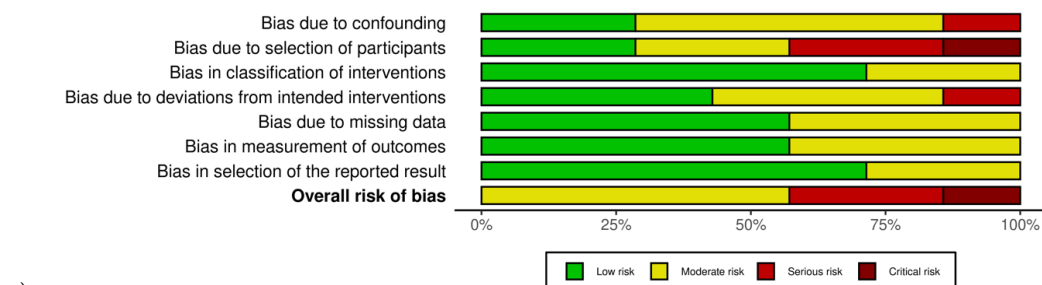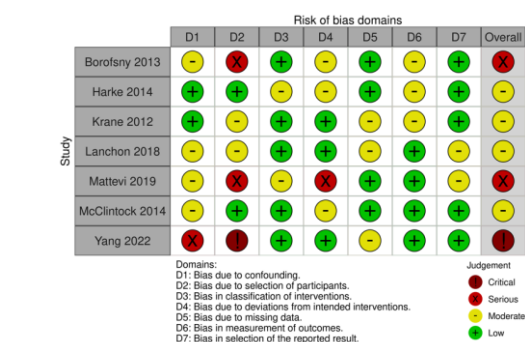

**Figure S3.** Risk of bias of the included study (ROBINS-I): (A) review authors' judgments about each risk of bias item presented as percentages across all included studies; (B) review authors' judgments about each risk of bias item for each included study.
